# Supplementary material
Source: PubMed Central journal article supplement (PMC5612408)
Supplement: NIHMS902602-supplement-MIFlowCyt.pdf [file NIHMS902602-supplement-MIFlowCyt.pdf]

**Cytometry Part A**  
**Author Checklist: MIFlowCyt-Compliant Items**

| <b>Requirement</b>                                     | <b>Please Include Requested Information</b>                                                                                                                                                                                                                                                                                                                                             |
|--------------------------------------------------------|-----------------------------------------------------------------------------------------------------------------------------------------------------------------------------------------------------------------------------------------------------------------------------------------------------------------------------------------------------------------------------------------|
| 1.1. Purpose                                           | Optimization of Fluorescent Cell Barcoding technique for surface staining using human PBMCs                                                                                                                                                                                                                                                                                             |
| 1.2. Keywords                                          | flow cytometry, fluorescent cell barcoding, immunophenotyping, human PBMCs                                                                                                                                                                                                                                                                                                              |
| 1.3. Experiment variables                              | Barcoding dye working concentrations, number of cells required for combined samples, dye combinations                                                                                                                                                                                                                                                                                   |
| 1.4. Organization name and address                     | National Heart, Lung, and Blood Institute, National Institutes of Health, 9000 Rockville Pike, Bethesda, Maryland 20892                                                                                                                                                                                                                                                                 |
| 1.5. Primary contact name and email address            | Valentina Giudice: valentina.giudice@nih.gov                                                                                                                                                                                                                                                                                                                                            |
| 1.6. Date or time period of experiment                 | 10/2016 to 01/2017                                                                                                                                                                                                                                                                                                                                                                      |
| 1.7. Conclusions                                       | Using DyLight 350, DyLight 800, Pacific Orange, and CBD500, six, nine, or 36 human peripheral blood specimens can be efficiently barcoded and stained with a five-color phenotyping for TCR V $\beta$ usage in CD4+ and CD8+ T cells, or alternatively with Aqua viability dye, for cell viability assessment.                                                                          |
| 1.8. Quality control measures                          | Controls were run for each conditions, as described in Material and Methods, Combination staining with Aqua Viability and FCB dyes paragraph and Combination staining with FCB dyes and antibodies paragraph. Dye stability was also tested at 24 and 48h.                                                                                                                              |
| 2.1.1.1. (2.1.2.1., 2.1.3.1.) Sample description       | human PBMCs, details in Material and Methods, Human samples.                                                                                                                                                                                                                                                                                                                            |
| 2.1.1.2. Biological sample source description          | Human peripheral blood mononuclear cells (PBMCs)                                                                                                                                                                                                                                                                                                                                        |
| 2.1.1.3. Biological sample source organism description | Human PBMCs were isolated from whole peripheral blood of healthy volunteers                                                                                                                                                                                                                                                                                                             |
| 2.1.2.2. Environmental sample location                 | -80°C storage                                                                                                                                                                                                                                                                                                                                                                           |
| 2.3. Sample treatment description                      | Detailed description in the following paragraphs in Material and Methods section: Staining with FCB dyes, Combination staining with Aqua Viability and FCB dyes, Combination staining with FCB dyes and antibodies                                                                                                                                                                      |
| 2.4. Fluorescence reagent(s) description               | Material and Methods, Reagents                                                                                                                                                                                                                                                                                                                                                          |
| 3.1. Instrument manufacturer                           | BD Biosciences. Details in Material and Methods, Data acquisition and analysis                                                                                                                                                                                                                                                                                                          |
| 3.2. Instrument model                                  | LSR Fortessa cytometer. Details in Material and Methods, Data acquisition and analysis                                                                                                                                                                                                                                                                                                  |
| 3.3. Instrument configuration and settings             | Details in Material and Methods, Data acquisition and analysis                                                                                                                                                                                                                                                                                                                          |
| 4.1. List-mode data files                              | 1) The link for peer-review process:<br><a href="https://flowrepository.org/id/RvFrqTKB41wdv33WH9vPM8DwLtkWUn2IFNJfopVhqw3fjwimWyOLZEgUvMxEKO4E">https://flowrepository.org/id/RvFrqTKB41wdv33WH9vPM8DwLtkWUn2IFNJfopVhqw3fjwimWyOLZEgUvMxEKO4E</a><br>2) The repository identifier:<br><a href="http://flowrepository.org/id/FR-FCM-ZY3M">http://flowrepository.org/id/FR-FCM-ZY3M</a> |
| 4.2. Compensation description                          | Compensation was performed using a bead standard for each fluorochrome and barcoded cells at the highest concentration of each dye for FCB dyes. Details in Material and Methods, Data acquisition and analysis                                                                                                                                                                         |
| 4.3. Data transformation details                       | All data were displayed with a bioexponential transformation, except for linear scaling (FSC and SSC). Histograms are shown using bioexponential transformation for the dye of interest (x axis) and normalized                                                                                                                                                                         |

|                         |                                                                                                                                                                                       |
|-------------------------|---------------------------------------------------------------------------------------------------------------------------------------------------------------------------------------|
|                         | number of barcoded lymphocytes (y axis)                                                                                                                                               |
| 4.4.1. Gate description | Details in Material and Methods, Data acquisition and analysis; supplemental Figure 2; Results, co-staining with FCB dyes and antibodies. Flowjo file are also uploaded on repository |
| 4.4.2. Gate statistics  | Percentage of positive cells, MFI, CV, MFI fold change                                                                                                                                |
| 4.4.3. Gate boundaries  |                                                                                                                                                                                       |

**Notes**

Feel free to use more space than allocated.

You can embed graphics/figures in this document, if needed.

Please make sure to save the document in Microsoft Word version 2003 or older, before uploading to ScholarOne Manuscripts. When uploading this checklist to ScholarOne Manuscripts, please choose the “Supplementary Material for Review” category.

Please note that if your paper is accepted, the checklist will be published as an Online Supporting Information.

For any questions, please contact the Cytometry Part A editorial office at [Cytometry@wiley.com](mailto:Cytometry@wiley.com).
