# Supplementary material
Source: PubMed Central journal article supplement (PMC5612408)
Supplement: NIHMS902602-supplement-Supplemental_Figures.pdf [file NIHMS902602-supplement-Supplemental_Figures.pdf]

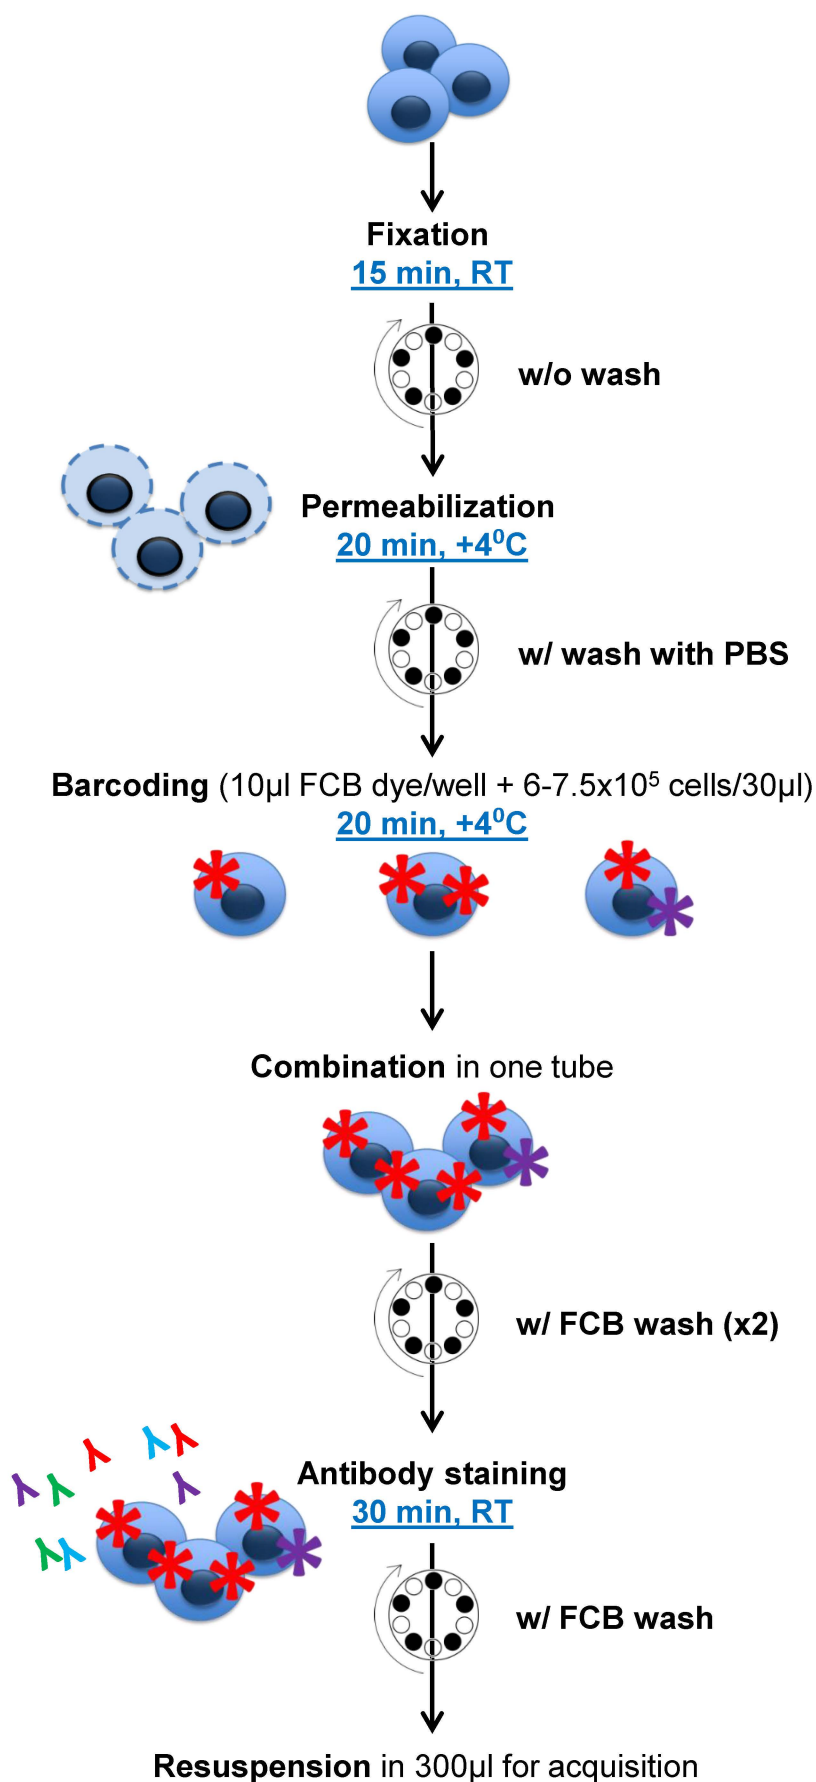

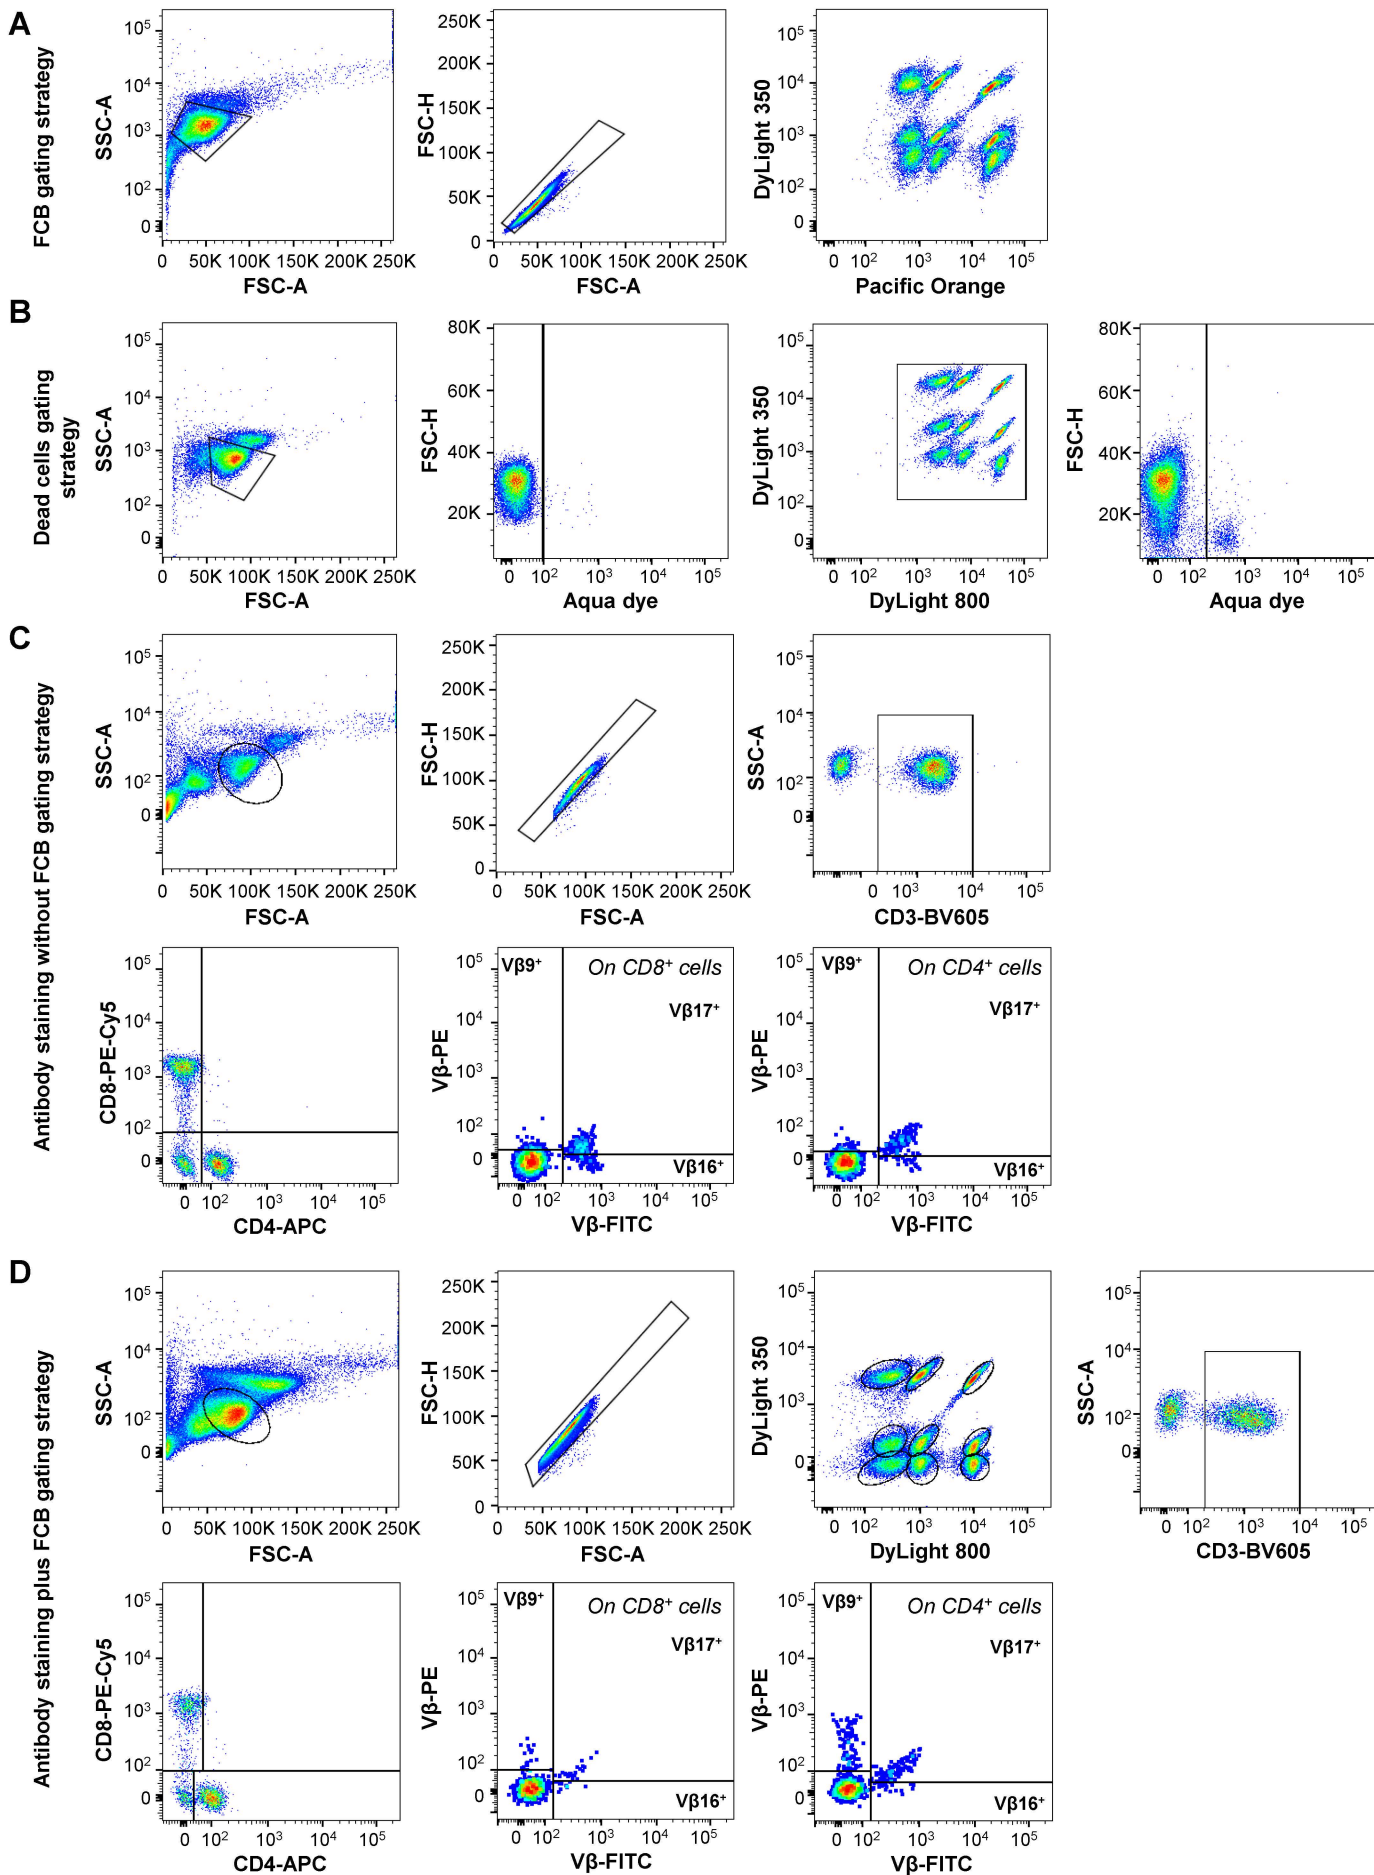

A

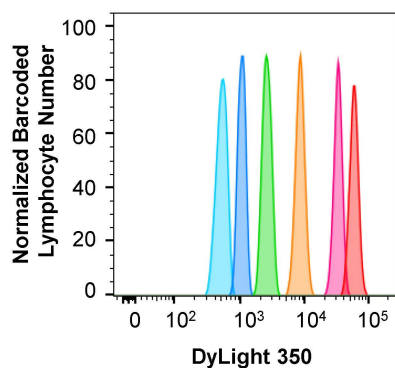

DyLight 350

|      | <u>MFI</u> | <u>CV</u> | <u>Fold increase</u> |
|------|------------|-----------|----------------------|
| 0    | 432.2      | 18.02     |                      |
| 1.56 | 770.4      | 12.34     | 1.68                 |
| 13   | 2268.6     | 12.96     | 2.88                 |
| 50   | 7390.2     | 13.52     | <b>3.23</b>          |
| 250  | 29221.4    | 11.94     | <b>3.95</b>          |
| 500  | 50796      | 12.72     | 1.74                 |

B

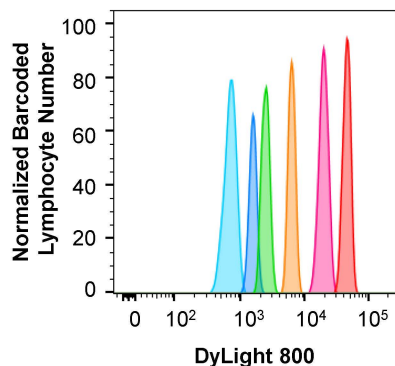

DyLight 800

|      | <u>MFI</u> | <u>CV</u> | <u>Fold increase</u> |
|------|------------|-----------|----------------------|
| 0    | 578.6      | 17.62     |                      |
| 1.56 | 1539.6     | 8.624     | 2.57                 |
| 13   | 2625.6     | 9.896     | 1.69                 |
| 50   | 6148.6     | 10.192    | 2.33                 |
| 250  | 18333.8    | 13.62     | 2.97                 |
| 500  | 43791.8    | 12.06     | 2.39                 |

C

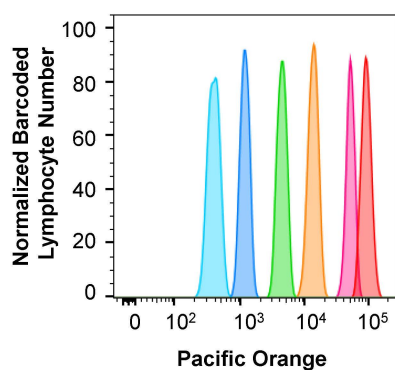

Pacific Orange

|      | <u>MFI</u> | <u>CV</u> | <u>Fold increase</u> |
|------|------------|-----------|----------------------|
| 0    | 649.6      | 18.54     |                      |
| 1.56 | 1660.6     | 14.16     | 2.46                 |
| 13   | 4321.4     | 13.74     | 2.57                 |
| 50   | 14057.6    | 14.8      | <b>3.24</b>          |
| 250  | 51838.4    | 11.68     | <b>3.68</b>          |
| 500  | 90700      | 11.666    | 1.75                 |

D

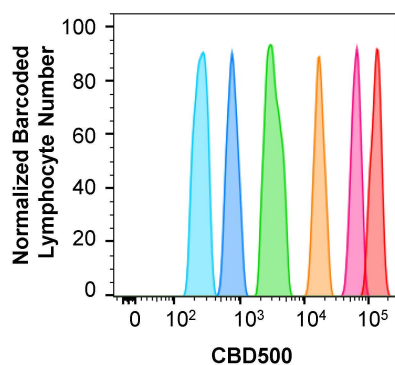

CBD500

|      | <u>MFI</u> | <u>CV</u> | <u>Fold increase</u> |
|------|------------|-----------|----------------------|
| 0    | 321.4      | 17.5      |                      |
| 1.56 | 939.4      | 16.34     | 2.72                 |
| 13   | 4285.4     | 16.96     | <b>4.47</b>          |
| 50   | 13182.4    | 13.88     | <b>3.06</b>          |
| 250  | 66927.2    | 13.5      | <b>5.07</b>          |
| 500  | 138229     | 14        | 2.06                 |

A

|                       |         | <u>Pacific Orange</u> |           |                      | <u>DyLight 800</u> |           |                      |     |
|-----------------------|---------|-----------------------|-----------|----------------------|--------------------|-----------|----------------------|-----|
|                       |         | <u>MFI</u>            | <u>CV</u> | <u>Fold increase</u> | <u>MFI</u>         | <u>CV</u> | <u>Fold increase</u> |     |
| Concentration (µg/ml) | Combo 1 | 0                     | 732       | 20                   | 1242               | 33.3      |                      |     |
|                       |         | 13                    | 2655      | 20.5                 | 3.5                | 5649      | 27.7                 | 4.4 |
|                       |         | 250                   | 28258     | 27.5                 | 10.6               | 31628     | 23.2                 | 5.6 |
|                       | Combo 2 | 1.56                  | 1601      | 19.7                 | 3750               | 24.2      |                      |     |
|                       |         | 50                    | 6390      | 19.5                 | 3.9                | 13995     | 19.2                 | 3.7 |
|                       |         | 500                   | 38141     | 20.1                 | 5.9                | 33778     | 22.5                 | 2.4 |

B

|                       |         | <u>Pacific Orange</u> |           |                      | <u>DyLight 350</u> |           |                      |     |
|-----------------------|---------|-----------------------|-----------|----------------------|--------------------|-----------|----------------------|-----|
|                       |         | <u>MFI</u>            | <u>CV</u> | <u>Fold increase</u> | <u>MFI</u>         | <u>CV</u> | <u>Fold increase</u> |     |
| Concentration (µg/ml) | Combo 1 | 0                     | 591       | 23.2                 | 389                | 22.9      |                      |     |
|                       |         | 13                    | 1990      | 21.4                 | 3.2                | 912       | 23.4                 | 2.2 |
|                       |         | 250                   | 23076     | 25.2                 | 11.5               | 9269      | 25.4                 | 9.9 |
|                       | Combo 2 | 1.56                  | 1433      | 22.5                 | 528                | 25.3      |                      |     |
|                       |         | 50                    | 6276      | 24.4                 | 4.3                | 2366      | 28.2                 | 4.2 |
|                       |         | 500                   | 45679     | 22.2                 | 7.2                | 18302     | 26.1                 | 7.6 |

C

|                       |         | <u>DyLight 800</u> |           |                      | <u>DyLight 350</u> |           |                      |      |
|-----------------------|---------|--------------------|-----------|----------------------|--------------------|-----------|----------------------|------|
|                       |         | <u>MFI</u>         | <u>CV</u> | <u>Fold increase</u> | <u>MFI</u>         | <u>CV</u> | <u>Fold increase</u> |      |
| Concentration (µg/ml) | Combo 1 | 0                  | 639       | 29.3                 | 241                | 26.4      |                      |      |
|                       |         | 13                 | 2326      | 18.8                 | 3.5                | 911       | 21.7                 | 3.3  |
|                       |         | 250                | 22868     | 16.6                 | 9.7                | 10678     | 19.4                 | 11.4 |
|                       | Combo 2 | 1.56               | 2615      | 22.4                 | 674                | 27.1      |                      |      |
|                       |         | 50                 | 7753      | 16.2                 | 2.9                | 2489      | 22.1                 | 3.5  |
|                       |         | 500                | 37017     | 15.8                 | 4.8                | 17801     | 18.8                 | 7.1  |

**A** **4x(3x3) matrix – 36 samples**  
**Pacific Orange vs DyLight 800 vs DyLight 350**

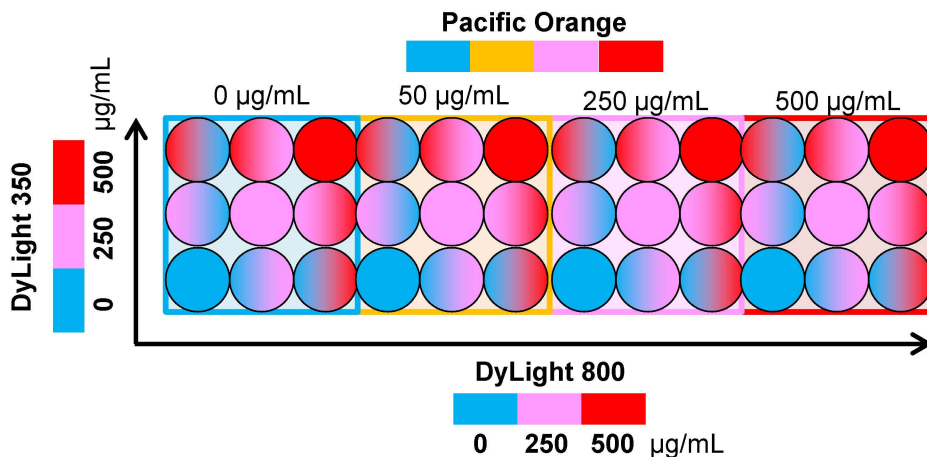

**B**

| Concentration (µg/ml) | DyLight 350 |      |               | DyLight 800 |      |               | Pacific Orange |      |               |
|-----------------------|-------------|------|---------------|-------------|------|---------------|----------------|------|---------------|
|                       | MFI         | CV   | Fold increase | MFI         | CV   | Fold increase | MFI            | CV   | Fold increase |
| 0                     | 482         | 27.4 |               | 3920        | 18.4 |               | 1767           | 18.9 |               |
| 50                    |             |      |               |             |      |               | 9606           | 16.3 | 5.4           |
| 250                   | 2518        | 18.3 | 4.9           | 10157       | 18.1 | 2.6           | 37445          | 17.1 | 3.9           |
| 500                   | 20131       | 16.1 | 7.9           | 39532       | 13.2 | 3.9           | 67078          | 18.5 | 1.8           |

**C**

| Concentration (µg/ml) | DyLight 350 |      |               | DyLight 800 |      |               | CBD500 |      |               |
|-----------------------|-------------|------|---------------|-------------|------|---------------|--------|------|---------------|
|                       | MFI         | CV   | Fold increase | MFI         | CV   | Fold increase | MFI    | CV   | Fold increase |
| 0                     | 732         | 20.3 |               | 4737        | 14.2 |               | 382    | 14.7 |               |
| 50                    |             |      |               |             |      |               | 1079   | 13.9 | 2.7           |
| 250                   | 2971        | 19.7 | 3.9           | 9681        | 16.6 | 2.0           | 3821   | 15.4 | 3.5           |
| 500                   | 21256       | 18.8 | 7.1           | 38489       | 14.2 | 4.0           | 7604   | 13.1 | 2.0           |

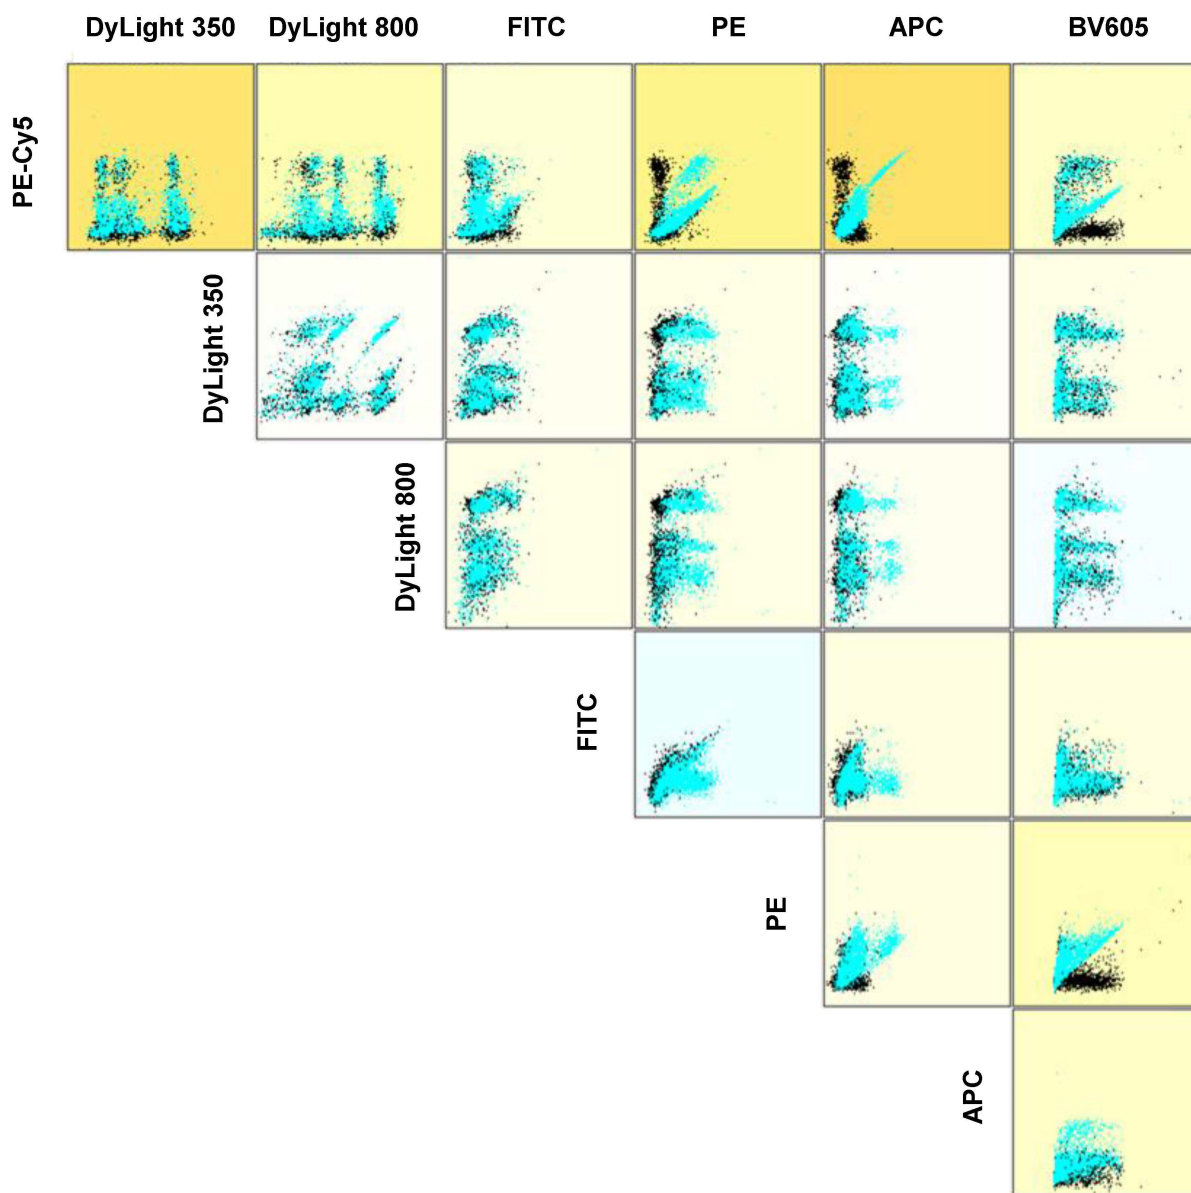

**Percentage of positive cells**

**CD3-BV605**

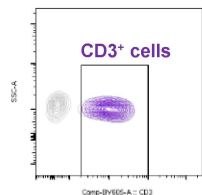

|                     | 0                   |      |      | 13   |      |      | 250  |      |      | Control w/o FCB | Variability | Ratio |
|---------------------|---------------------|------|------|------|------|------|------|------|------|-----------------|-------------|-------|
|                     | 0                   | 13   | 250  | 0    | 13   | 250  | 0    | 13   | 250  |                 |             |       |
|                     | DyLight 350 (µg/ml) |      |      |      |      |      |      |      |      |                 |             |       |
| DyLight 800 (µg/ml) |                     |      |      |      |      |      |      |      |      |                 |             |       |
| HC-1                | 48.6                | 44   | 43.2 | 41.3 | 40.7 | 40.1 | 48.2 | 47.2 | 50.3 | 46.2            | LOW         | 0.97  |
| HC-2                | 50.7                | 55.2 | 57.3 | 53.3 |      | 56.2 | 65.7 | 67   | 70.6 | 61.8            | LOW         | 0.96  |
| HC-3                | 67.5                | 71.1 | 71.6 | 71.4 | 71.1 | 72.2 | 72.7 | 75.9 | 76.7 | 76              | LOW         | 0.95  |
| HC-4                | 70.7                | 71.6 | 72.8 | 69.9 | 71.8 | 75.6 | 78.2 | 77.2 | 79.4 | 74.4            | LOW         | 1.00  |
| HC-5                | 65                  | 61.9 | 67.8 | 57.8 | 57.1 | 62.3 | 77.7 | 78.1 | 79.1 | 56.9            | LOW         | 1.18  |
| HC-6                | 78.8                | 76   | 78.7 | 71.3 | 70   | 68.3 | 83.3 | 82.2 | 82.5 | 77              | LOW         | 1.00  |
| HC-7                | 51.9                |      | 54.8 | 46   | 49.8 | 48.3 | 67.5 | 68.7 | 68.4 | 44.1            | LOW         | 1.29  |
| HC-8                | 70.1                | 66.3 | 75.2 | 62.5 | 63.1 | 68.3 | 77.5 | 76   | 78.3 | 64.1            | LOW         | 1.10  |

**Vβ-FITC/PE**

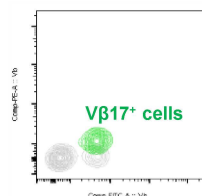

|                     | 0                   |      |      | 13   |      |      | 250  |      |      | Control w/o FCB | Variability | Ratio |
|---------------------|---------------------|------|------|------|------|------|------|------|------|-----------------|-------------|-------|
|                     | 0                   | 13   | 250  | 0    | 13   | 250  | 0    | 13   | 250  |                 |             |       |
|                     | DyLight 350 (µg/ml) |      |      |      |      |      |      |      |      |                 |             |       |
| DyLight 800 (µg/ml) |                     |      |      |      |      |      |      |      |      |                 |             |       |
| HC-1                | 2.67                | 2.81 | 3.28 | 1.53 | 2.11 | 4.39 | 3.09 | 3.5  | 3.42 | 3.8             | LOW         | 0.78  |
| HC-2                | 2.8                 | 1.6  | 3.23 | 2.93 |      | 3.8  | 3.5  | 3.01 | 4.63 | 3.82            | LOW         | 0.83  |
| HC-3                | 3.78                | 5.19 | 7.18 | 4.02 | 4.06 | 6.06 | 5.83 | 4.24 | 8.14 | 6.65            | LOW         | 0.81  |
| HC-4                | 10.4                | 11.5 | 12.5 | 11   | 12.9 | 22.7 | 12.7 | 13.7 | 16   | 10.9            | LOW         | 1.26  |
| HC-5                | 2.06                | 3.28 | 3.09 | 1.23 | 2.15 | 2.02 | 2.53 | 1.85 | 3.03 | 2.52            | LOW         | 0.94  |
| HC-6                | 2.91                | 2.26 | 3.1  | 2.32 | 2.16 | 3.09 | 2.11 | 2.33 | 2.47 | 2.47            | LOW         | 1.02  |
| HC-7                | 2.38                |      | 2.7  | 3.36 | 2.15 | 3.69 | 2.37 | 1.73 | 2.6  | 2.93            | LOW         | 0.90  |
| HC-8                | 0.64                | 0.47 | 1.36 | 0.58 | 0.46 | 0.59 | 0.66 | 0.85 | 0.86 | 0.85            | LOW         | 0.85  |

**Vβ-PE**

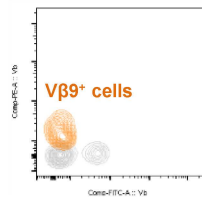

|                     | 0                   |      |      | 13   |      |      | 250  |      |      | Control w/o FCB | Variability | Ratio |
|---------------------|---------------------|------|------|------|------|------|------|------|------|-----------------|-------------|-------|
|                     | 0                   | 13   | 250  | 0    | 13   | 250  | 0    | 13   | 250  |                 |             |       |
|                     | DyLight 350 (µg/ml) |      |      |      |      |      |      |      |      |                 |             |       |
| DyLight 800 (µg/ml) |                     |      |      |      |      |      |      |      |      |                 |             |       |
| HC-1                | 1.53                | 1.2  | 1.82 | 2.45 | 0.9  | 1.88 | 0.62 | 0.27 | 1.14 | 1.37            | LOW         | 0.96  |
| HC-2                | 1.75                | 1.33 | 0.25 | 1.02 |      | 0.84 | 1.23 | 1.42 | 1.6  | 0.99            | LOW         | 1.19  |
| HC-3                | 2.77                | 3.8  | 2.71 | 2.57 | 2.2  | 3.24 | 2.35 | 3.33 | 3.76 | 1.97            | LOW         | 1.51  |
| HC-4                | 1.52                | 0.85 | 1.39 | 0.27 | 0.26 | 0.45 | 1.6  | 1.83 | 0.81 | 1.44            | LOW         | 0.69  |
| HC-5                | 1.52                | 0.99 | 1.34 | 1.7  | 1.08 | 0.97 | 1.06 | 1.37 | 1.56 | 1.75            | LOW         | 0.74  |
| HC-6                | 4.06                | 2.63 | 2.94 | 4.21 | 3.39 | 3.51 | 3.17 | 2.91 | 2.4  | 3.07            | LOW         | 1.06  |
| HC-7                | 0.32                |      | 0.35 | 0.19 | 0.41 | 0.74 | 0.17 | 0.23 | 0.28 | 0.66            | LOW         | 0.51  |
| HC-8                | 0.78                | 0.37 | 0.9  | 0.35 | 0.66 | 0.39 | 0.33 | 0.17 | 0.38 | 0.48            | LOW         | 1.00  |

**Vβ-FITC**

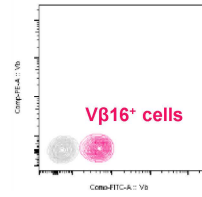

|                     | 0                   |      |      | 13   |      |      | 250  |      |      | Control w/o FCB | Variability | Ratio |
|---------------------|---------------------|------|------|------|------|------|------|------|------|-----------------|-------------|-------|
|                     | 0                   | 13   | 250  | 0    | 13   | 250  | 0    | 13   | 250  |                 |             |       |
|                     | DyLight 350 (µg/ml) |      |      |      |      |      |      |      |      |                 |             |       |
| DyLight 800 (µg/ml) |                     |      |      |      |      |      |      |      |      |                 |             |       |
| HC-1                | 1.53                | 0.4  | 1.09 | 1.83 | 2.41 | 1.57 | 2.15 | 1.62 | 2.56 | 2.43            | LOW         | 0.69  |
| HC-2                | 5.94                | 2.93 | 2.49 | 3.57 |      | 2.95 | 1.44 | 2.48 | 1.25 | 2.36            | LOW         | 1.22  |
| HC-3                | 4.91                | 5.06 | 2.24 | 4.8  | 4.29 | 2.19 | 4.37 | 4.04 | 2.14 | 2.45            | LOW         | 1.54  |
| HC-4                | 5.81                | 4.7  | 6.71 | 7.24 | 6.04 | 0.89 | 5.5  | 5.25 | 1.22 | 4.89            | LOW         | 0.99  |
| HC-5                | 0.98                | 0.89 | 0.58 | 0.94 | 0.88 | 0.61 | 0.98 | 1.05 | 0.62 | 0.98            | LOW         | 0.85  |
| HC-6                | 2.2                 | 1.88 | 0.4  | 1.74 | 1.39 | 1.17 | 1.06 | 1.29 | 0.47 | 1.12            | LOW         | 1.15  |
| HC-7                | 0.53                |      | 0.24 | 0.75 | 1.23 | 0.46 | 1.07 | 1.05 | 0.49 | 1.2             | LOW         | 0.61  |
| HC-8                | 20.4                | 23.2 | 23.5 | 22.5 | 23   | 21.8 | 22.8 | 20.5 | 20.4 | 13.6            | HIGH        | 1.62  |

**CD8-PE-Cy5**

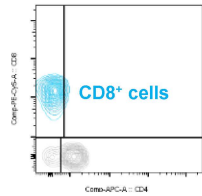

|                     | 0                   |      |      | 13   |      |      | 250  |      |      | Control w/o FCB | Variability | Ratio |
|---------------------|---------------------|------|------|------|------|------|------|------|------|-----------------|-------------|-------|
|                     | 0                   | 13   | 250  | 0    | 13   | 250  | 0    | 13   | 250  |                 |             |       |
|                     | DyLight 350 (µg/ml) |      |      |      |      |      |      |      |      |                 |             |       |
| DyLight 800 (µg/ml) |                     |      |      |      |      |      |      |      |      |                 |             |       |
| HC-1                | 11.7                | 12.7 | 13.4 | 14.7 | 13.6 | 14.6 | 13.3 | 13.7 | 12.2 | 15.5            | HIGH        | 0.86  |
| HC-2                | 37.9                | 41.1 | 41.9 | 40.7 |      | 43.7 | 40   | 36.9 | 36.9 | 42.6            | LOW         | 0.94  |
| HC-3                | 39.1                | 41.4 | 38.8 | 41.7 | 40.2 | 39.6 | 38.4 | 39.6 | 37.5 | 44.5            | HIGH        | 0.89  |
| HC-4                | 19.5                | 23.1 | 21   | 22.3 | 22.6 | 22.1 | 20   | 20.2 | 22.2 | 23.8            | LOW         | 0.90  |
| HC-5                | 29.4                | 32.2 | 30.6 | 36.5 | 35.2 | 35.8 | 29   | 27.6 | 28.5 | 35.4            | LOW         | 0.89  |
| HC-6                | 23.9                | 26.2 | 25.8 | 37.2 | 38.1 | 39.6 | 30.4 | 31.3 | 31.4 | 35.2            | LOW         | 0.90  |
| HC-7                | 39.5                |      | 35.4 | 43.2 | 40.6 | 41.7 | 31.5 | 29.8 | 29.3 | 39              | LOW         | 0.93  |
| HC-8                | 37.1                | 40.1 | 37.3 | 47.4 | 47.3 | 48.6 | 41   | 38.4 | 40.9 | 44              | LOW         | 0.95  |

**CD4-APC**

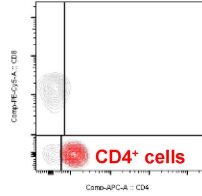

|                     | 0                   |      |      | 13   |      |      | 250  |      |      | Control w/o FCB | Variability | Ratio |
|---------------------|---------------------|------|------|------|------|------|------|------|------|-----------------|-------------|-------|
|                     | 0                   | 13   | 250  | 0    | 13   | 250  | 0    | 13   | 250  |                 |             |       |
|                     | DyLight 350 (µg/ml) |      |      |      |      |      |      |      |      |                 |             |       |
| DyLight 800 (µg/ml) |                     |      |      |      |      |      |      |      |      |                 |             |       |
| HC-1                | 85.5                | 84.1 | 81.3 | 82.7 | 83.1 | 80.3 | 75   | 73.9 | 70.5 | 82.2            | LOW         | 0.97  |
| HC-2                | 52                  | 47.1 | 42.6 | 49.3 |      | 42   | 41   | 42.7 | 36.5 | 49.6            | LOW         | 0.89  |
| HC-3                | 33.6                | 35   | 31.4 | 34.3 | 35.1 | 30   | 36.4 | 35.4 | 31   | 36.7            | LOW         | 0.91  |
| HC-4                | 66                  | 66.3 | 63.6 | 64.1 | 63.5 | 59.8 | 64.1 | 62.3 | 58.6 | 64.5            | LOW         | 0.98  |
| HC-5                | 54.7                | 50.2 | 49.2 | 44.3 | 45.7 | 37.9 | 38.6 | 38.2 | 35.3 | 45.1            | LOW         | 0.97  |
| HC-6                | 71.4                | 68.3 | 68   | 55.8 | 54.2 | 50.1 | 51.6 | 52   | 50.6 | 56.6            | LOW         | 1.02  |
| HC-7                | 54.7                |      | 55.2 | 50.7 | 53.5 | 41.7 | 38.1 | 37.3 | 35.7 | 52.2            | LOW         | 0.88  |
| HC-8                | 54.2                | 50.5 | 47.4 | 40.2 | 41   | 30.8 | 35.5 | 36.9 | 36.5 | 18.6            | HIGH        | 2.23  |

**Median Fluorescence Intensity**

**CD3-BV605**

|                     | 0    |      |      | 13   |      |      | 250  |      |      | 0 µg/ml population | Variability | Ratio |
|---------------------|------|------|------|------|------|------|------|------|------|--------------------|-------------|-------|
|                     | 0    | 13   | 250  | 0    | 13   | 250  | 0    | 13   | 250  |                    |             |       |
| DyLight 350 (µg/ml) |      |      |      |      |      |      |      |      |      |                    |             |       |
| DyLight 800 (µg/ml) | 0    | 13   | 250  | 0    | 13   | 250  | 0    | 13   | 250  |                    |             |       |
| HC-1                | 794  | 914  | 875  | 923  | 853  | 875  | 931  | 899  | 869  | 794                | HIGH        | 1.11  |
| HC-2                | 563  | 586  | 588  | 618  |      | 586  | 772  | 721  | 733  | 563                | LOW         | 1.15  |
| HC-3                | 658  | 673  | 750  | 676  | 714  | 731  | 794  | 790  | 826  | 658                | LOW         | 1.12  |
| HC-4                | 857  | 955  | 1010 | 906  | 923  | 962  | 1122 | 1165 | 1093 | 857                | LOW         | 1.17  |
| HC-5                | 1083 | 1063 | 1109 | 1046 | 1051 | 1017 | 1247 | 1173 | 1124 | 1083               | LOW         | 1.02  |
| HC-6                | 1027 | 1078 | 1083 | 1003 | 1001 | 957  | 1086 | 1068 | 1061 | 1027               | LOW         | 1.01  |
| HC-7                | 741  |      | 889  | 764  | 798  | 796  | 1008 | 1024 | 964  | 741                | LOW         | 1.18  |
| HC-8                | 973  | 987  | 1012 | 1003 | 989  | 914  | 1106 | 1053 | 1066 | 973                | LOW         | 1.04  |

**Vβ-FITC/PE PE MFI**

|                     | 0    |      |      | 13   |      |      | 250  |      |      | 0 µg/ml population | Variability | Ratio |
|---------------------|------|------|------|------|------|------|------|------|------|--------------------|-------------|-------|
|                     | 0    | 13   | 250  | 0    | 13   | 250  | 0    | 13   | 250  |                    |             |       |
| DyLight 350 (µg/ml) |      |      |      |      |      |      |      |      |      |                    |             |       |
| DyLight 800 (µg/ml) | 0    | 13   | 250  | 0    | 13   | 250  | 0    | 13   | 250  |                    |             |       |
| HC-1                | 76.7 | 55.6 | 94.2 | 76.7 | 86.7 | 73   | 94.8 | 65.9 | 127  | 76.7               | LOW         | 1.09  |
| HC-2                | 82.8 | 104  | 74.4 | 64.2 |      | 69   | 75.8 | 75.8 | 95.5 | 82.8               | LOW         | 0.97  |
| HC-3                | 74.4 | 68.4 | 80.5 | 69.8 | 81.4 | 85.8 | 69.8 | 66.4 | 92.7 | 74.4               | LOW         | 1.03  |
| HC-4                | 79.3 | 84   | 118  | 81.4 | 86.7 | 93   | 85.2 | 115  | 137  | 79.3               | LOW         | 1.23  |
| HC-5                | 83.1 | 82.2 | 92.7 | 100  | 93.6 | 107  | 79   | 85.8 | 90   | 83.1               | LOW         | 1.09  |
| HC-6                | 89.4 | 76.4 | 95.2 | 83.1 | 85.5 | 93   | 74.4 | 80.8 | 107  | 89.4               | LOW         | 0.98  |
| HC-7                | 137  |      | 93.9 | 71.5 | 82.2 | 89.1 | 82.8 | 105  | 93.6 | 137                | HIGH        | 0.69  |
| HC-8                | 122  | 134  | 148  | 127  | 112  | 153  | 139  | 128  | 167  | 122                | LOW         | 1.12  |

**Vβ-FITC/PE FITC MFI**

|                     | 0   |     |     | 13  |     |     | 250 |     |     | 0 µg/ml population | Variability | Ratio |
|---------------------|-----|-----|-----|-----|-----|-----|-----|-----|-----|--------------------|-------------|-------|
|                     | 0   | 13  | 250 | 0   | 13  | 250 | 0   | 13  | 250 |                    |             |       |
| DyLight 350 (µg/ml) |     |     |     |     |     |     |     |     |     |                    |             |       |
| DyLight 800 (µg/ml) | 0   | 13  | 250 | 0   | 13  | 250 | 0   | 13  | 250 |                    |             |       |
| HC-1                | 288 | 310 | 244 | 274 | 334 | 225 | 329 | 247 | 210 | 288                | LOW         | 0.95  |
| HC-2                | 251 | 513 | 195 | 313 |     | 166 | 321 | 232 | 232 | 251                | LOW         | 1.11  |
| HC-3                | 281 | 257 | 233 | 267 | 254 | 229 | 232 | 279 | 253 | 281                | LOW         | 0.90  |
| HC-4                | 400 | 418 | 368 | 409 | 372 | 326 | 405 | 450 | 417 | 400                | LOW         | 0.99  |
| HC-5                | 315 | 316 | 257 | 408 | 337 | 299 | 307 | 377 | 232 | 315                | LOW         | 1.00  |
| HC-6                | 366 | 291 | 321 | 314 | 307 | 249 | 268 | 276 | 299 | 366                | LOW         | 0.82  |
| HC-7                | 370 |     | 234 | 268 | 267 | 214 | 261 | 279 | 232 | 370                | HIGH        | 0.72  |
| HC-8                | 442 | 507 | 339 | 370 | 486 | 371 | 433 | 486 | 335 | 442                | LOW         | 0.95  |

**Vβ-FITC**

|                     | 0   |     |     | 13  |     |     | 250 |     |     | 0 µg/ml population | Variability | Ratio |
|---------------------|-----|-----|-----|-----|-----|-----|-----|-----|-----|--------------------|-------------|-------|
|                     | 0   | 13  | 250 | 0   | 13  | 250 | 0   | 13  | 250 |                    |             |       |
| DyLight 350 (µg/ml) |     |     |     |     |     |     |     |     |     |                    |             |       |
| DyLight 800 (µg/ml) | 0   | 13  | 250 | 0   | 13  | 250 | 0   | 13  | 250 |                    |             |       |
| HC-1                | 227 | 218 | 259 | 228 | 172 | 229 | 180 | 174 | 195 | 227                | LOW         | 0.92  |
| HC-2                | 165 | 211 | 204 | 174 |     | 168 | 171 | 174 | 165 | 165                | LOW         | 1.08  |
| HC-3                | 205 | 197 | 176 | 200 | 203 | 197 | 207 | 213 | 191 | 205                | LOW         | 0.97  |
| HC-4                | 229 | 261 | 307 | 243 | 254 | 188 | 271 | 344 | 342 | 229                | LOW         | 1.18  |
| HC-5                | 252 | 208 | 301 | 256 | 334 | 209 | 229 | 185 | 240 | 252                | LOW         | 0.98  |
| HC-6                | 224 | 262 | 318 | 224 | 234 | 214 | 229 | 208 | 185 | 224                | LOW         | 1.04  |
| HC-7                | 228 |     | 211 | 201 | 188 | 186 | 177 | 179 | 173 | 228                | LOW         | 0.85  |
| HC-8                | 464 | 461 | 464 | 487 | 479 | 450 | 482 | 468 | 452 | 464                | LOW         | 1.01  |

**Vβ-PE**

|                     | 0   |     |     | 13  |     |     | 250 |      |     | 0 µg/ml population | Variability | Ratio |
|---------------------|-----|-----|-----|-----|-----|-----|-----|------|-----|--------------------|-------------|-------|
|                     | 0   | 13  | 250 | 0   | 13  | 250 | 0   | 13   | 250 |                    |             |       |
| DyLight 350 (µg/ml) |     |     |     |     |     |     |     |      |     |                    |             |       |
| DyLight 800 (µg/ml) | 0   | 13  | 250 | 0   | 13  | 250 | 0   | 13   | 250 |                    |             |       |
| HC-1                | 158 | 111 | 121 | 126 | 135 | 129 | 172 | 91.5 | 126 | 158                | LOW         | 0.82  |
| HC-2                | 182 | 215 | 217 | 153 |     | 133 | 211 | 168  | 167 | 182                | LOW         | 0.99  |
| HC-3                | 183 | 183 | 171 | 190 | 203 | 160 | 185 | 183  | 181 | 183                | LOW         | 1.00  |
| HC-4                | 114 | 124 | 210 | 166 | 137 | 102 | 167 | 206  | 106 | 114                | LOW         | 1.30  |
| HC-5                | 214 | 231 | 191 | 228 | 222 | 191 | 182 | 246  | 178 | 214                | LOW         | 0.98  |
| HC-6                | 200 | 223 | 180 | 200 | 208 | 158 | 168 | 185  | 175 | 200                | LOW         | 0.94  |
| HC-7                | 124 |     | 184 | 120 | 123 | 135 | 188 | 135  | 112 | 124                | LOW         | 1.13  |
| HC-8                | 166 | 126 | 165 | 212 | 151 | 168 | 257 | 412  | 239 | 166                | LOW         | 1.27  |

**CD8-PE-Cy5**

|                     | 0    |      |      | 13   |      |      | 250  |      |      | 0 µg/ml population | Variability | Ratio |
|---------------------|------|------|------|------|------|------|------|------|------|--------------------|-------------|-------|
|                     | 0    | 13   | 250  | 0    | 13   | 250  | 0    | 13   | 250  |                    |             |       |
| DyLight 350 (µg/ml) |      |      |      |      |      |      |      |      |      |                    |             |       |
| DyLight 800 (µg/ml) | 0    | 13   | 250  | 0    | 13   | 250  | 0    | 13   | 250  |                    |             |       |
| HC-1                | 1152 | 1078 | 942  | 1179 | 1125 | 909  | 1035 | 1045 | 928  | 1152               | LOW         | 0.91  |
| HC-2                | 928  | 871  | 738  | 924  |      | 610  | 939  | 937  | 806  | 928                | LOW         | 0.91  |
| HC-3                | 884  | 810  | 717  | 816  | 867  | 731  | 857  | 859  | 750  | 884                | LOW         | 0.92  |
| HC-4                | 1160 | 1135 | 1037 | 1130 | 1141 | 978  | 1157 | 1154 | 1030 | 1160               | LOW         | 0.95  |
| HC-5                | 1307 | 1141 | 1035 | 1202 | 1191 | 1067 | 1231 | 1125 | 1045 | 1307               | LOW         | 0.88  |
| HC-6                | 1438 | 1316 | 1163 | 1384 | 1377 | 1225 | 1313 | 1335 | 1182 | 1438               | LOW         | 0.91  |
| HC-7                | 1101 |      | 900  | 994  | 1023 | 926  | 1006 | 1055 | 926  | 1101               | LOW         | 0.90  |
| HC-8                | 1354 | 1335 | 1270 | 1411 | 1326 | 1240 | 1374 | 1361 | 1307 | 1354               | LOW         | 0.98  |

**CD4-APC**

|                     | 0    |      |      | 13   |      |      | 250  |      |      | 0 µg/ml population | Variability | Ratio |
|---------------------|------|------|------|------|------|------|------|------|------|--------------------|-------------|-------|
|                     | 0    | 13   | 250  | 0    | 13   | 250  | 0    | 13   | 250  |                    |             |       |
| DyLight 350 (µg/ml) |      |      |      |      |      |      |      |      |      |                    |             |       |
| DyLight 800 (µg/ml) | 0    | 13   | 250  | 0    | 13   | 250  | 0    | 13   | 250  |                    |             |       |
| HC-1                | 108  | 93.3 | 78.9 | 98.5 | 95.6 | 78.9 | 92   | 91.2 | 74.2 | 108                | LOW         | 0.83  |
| HC-2                | 78.9 | 70.8 | 63.2 | 81.1 |      | 62.3 | 80.8 | 85   | 70.3 | 78.9               | LOW         | 0.94  |
| HC-3                | 55.7 | 58.2 | 53.8 | 61.5 | 61.7 | 54   | 64.1 | 61.9 | 54.9 | 55.7               | LOW         | 1.05  |
| HC-4                | 80.6 | 84   | 74   | 82.5 | 84   | 72.6 | 83.5 | 83.5 | 74.7 | 80.6               | LOW         | 0.99  |
| HC-5                | 101  | 90.7 | 77.5 | 97.2 | 90.5 | 76.1 | 95.1 | 87.7 | 75.6 | 101                | LOW         | 0.87  |
| HC-6                | 115  | 110  | 92.5 | 109  | 104  | 89.2 | 105  | 103  | 91.2 | 115                | LOW         | 0.89  |
| HC-7                | 82   |      | 72.6 | 80.1 | 82   | 70.8 | 81.3 | 83   | 73.8 | 82                 | LOW         | 0.95  |
| HC-8                | 127  | 128  | 120  | 130  | 127  | 108  | 129  | 130  | 118  | 127                | LOW         | 0.98  |
